# Supplementary material
Source: publisher figshare collection journal article supplement (https://frontiersin.figshare.com/ndownloader/files/20322258)
Supplement: Supplementary file 1 [file 20322258]

## PART II

The figures below show the options for the between variance \*  $K$  (red vertical lines) for respectively 24 and 48 items and varying sizes  $K$ , compared to the simulated error variances of the 1,000 examinees (blue dots). Generally, when either  $K$  is small or the number of items within  $K$  is small, there are the fewest options for the between variance. It is therefore advisable to balance the number of items and  $K$ .

### **24 items**

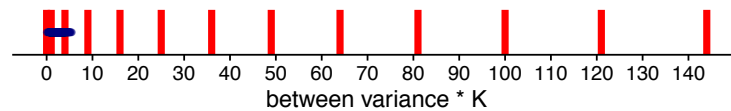

$K = 2$

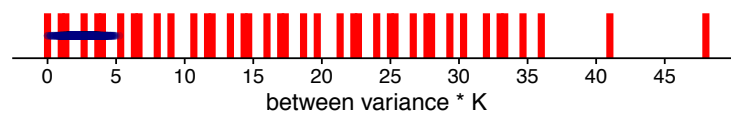

$K = 4$

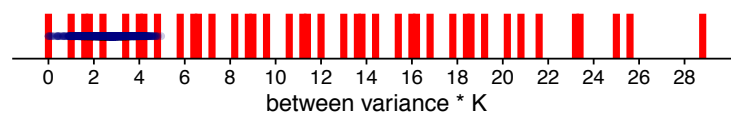

$K = 6$

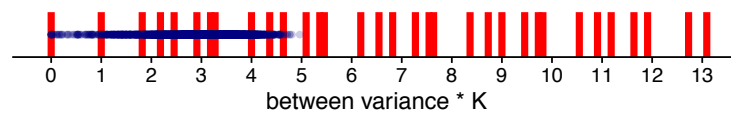

$K = 12$

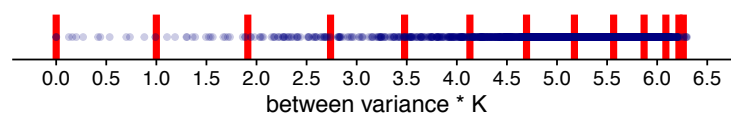

$K = 24$

48 items

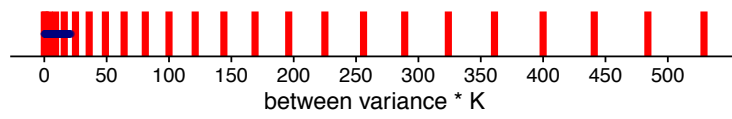

$K = 2$

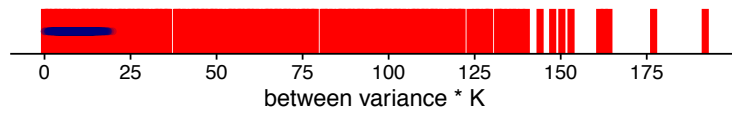

$K = 4$

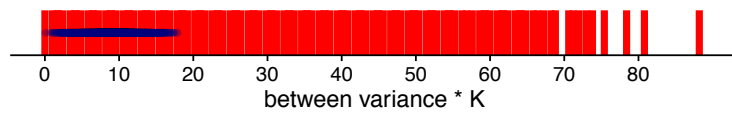

$K = 6$

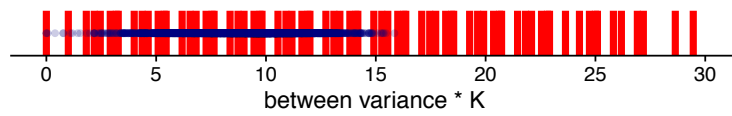

$K = 12$
